# Supplementary material for: Massive Gene Flux Drives Genome Diversity between Sympatric Streptomyces Conspecifics
Source: PubMed Central journal article supplement (PMC6722414; doi:10.1128/mbio.01533-19), 2019-09-03

Fig. S3

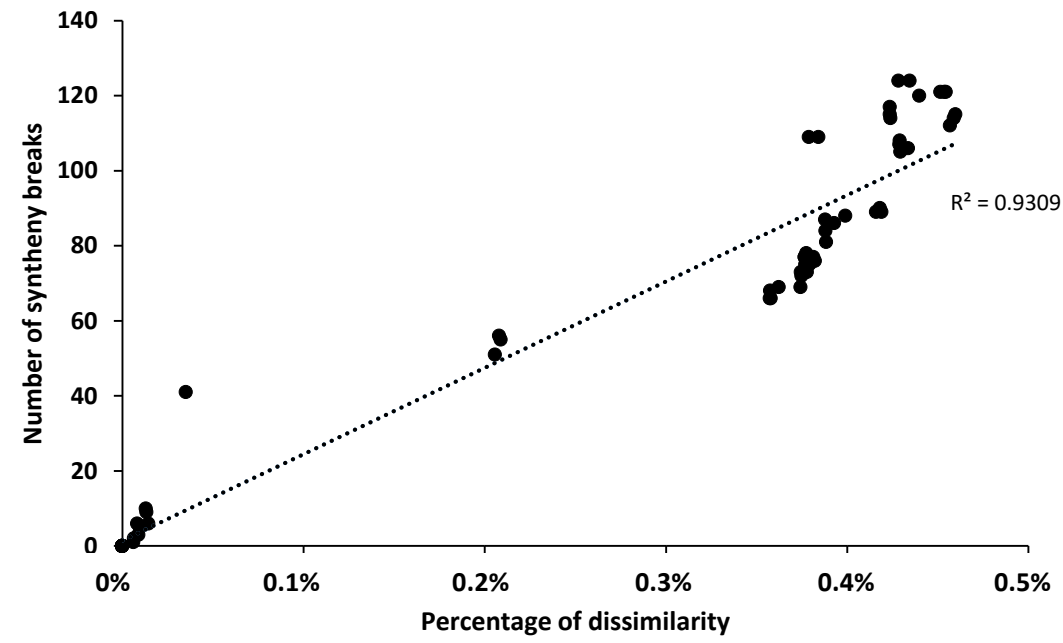

Supplement: mBio.01533-19-sf003.pdf [file mBio.01533-19-sf003.pdf]
