# Supplementary material for: Massive Gene Flux Drives Genome Diversity between Sympatric Streptomyces Conspecifics
Source: PubMed Central journal article supplement (PMC6722414; doi:10.1128/mbio.01533-19), 2019-09-03
Supplement: mBio.01533-19-st001.pdf [file mBio.01533-19-st001.pdf]

Table S1

| Strain  | Illumina sequencing |          | Nanopore sequencing |                 |          |                   | Estimated genome size |
|---------|---------------------|----------|---------------------|-----------------|----------|-------------------|-----------------------|
|         | Number of reads     | Coverage | Number of reads     | Number of bases | Coverage | Number of contigs |                       |
| RLB1-8  | 4,492,734**         | 150      | 655,492             | 1,794,236,654   | 150      | 2                 | 11,652,134            |
| RLB1-9  | 9,166,845*          | 107      | 88,694              | 488,157,099     | 41       | 3                 | 12,146,841            |
| RLB3-5  | 1,598,054           | 53       | 144,521             | 673,009,805     | 56       | 10                | 11,697,055            |
| RLB3-6  | 1,637,136           | 55       | 299,155             | 618,705,318     | 52       | 5                 | 12,454,816            |
| RLB3-17 | 1,988,311           | 66       | 202,455             | 603,258,039     | 50       | 1                 | 12,023,175            |
| S1A1-3  | 1,621,592           | 54       | 197,777             | 612,096,268     | 51       | 7                 | 11,988,482            |
| S1A1-7  | 1,752,105           | 58       | 533,299             | 876,735,911     | 73       | 18                | 11,820,843            |
| S1A1-8  | 1,595,659           | 53       | 780,962             | 632,637,759     | 53       | 16                | 12,040,123            |
| S1D4-14 | 1,397,227           | 47       | 2,065,804           | 4,195,872,938   | 350      | 5                 | 11,934,153            |
| S1D4-20 | 1,663,586           | 55       | 1,425,070           | 3,098,746,284   | 258      | 5                 | 12,255,226            |
| S1D4-23 | 1,771,880           | 59       | 400,348             | 735,306,850     | 61       | 8                 | 12,060,819            |
