# Supplementary material for: Massive Gene Flux Drives Genome Diversity between Sympatric Streptomyces Conspecifics
Source: PubMed Central journal article supplement (PMC6722414; doi:10.1128/mbio.01533-19), 2019-09-03
Supplement: mBio.01533-19-st002.pdf [file mBio.01533-19-st002.pdf]

Table S2

| Strain     | Replicon size        | Genome size | Number of Coding Sequence | G+C % | Terminal Inverted Repeat size (kb) | Accession number |
|------------|----------------------|-------------|---------------------------|-------|------------------------------------|------------------|
| RLB1-8     | 11,765,340           | 11,765,340  | 10,538                    | 70.2  | 357                                | CP041650         |
| RLB1-9     | 11,940,408           | 12,200,709  | 10,729                    | 70.2  | 311                                | CP041654         |
| pRLB1-9.1  | 154,158 <sup>C</sup> |             | 181                       | 69.0  | -                                  | CP041653         |
| pRLB1-9.2  | 106,143 <sup>L</sup> |             | 120                       | 68.7  | 24                                 | CP041652         |
| RLB3-5     | 11,898,970           | 11,898,970  | 10,632                    | 70.2  | 365                                | CP041651         |
| RLB3-6     | 12,338,263           | 12,448,281  | 11,088                    | 70.1  | 587                                | CP041602         |
| pRLB3-6.1  | 110,314 <sup>C</sup> |             | 100                       | 70.6  | -                                  | CP041601         |
| RLB3-17    | 12,023,175           | 12,023,175  | 10,809                    | 70.2  | 451                                | CP041610         |
| S1A1-3     | 12,042,091           | 12,042,091  | 10,801                    | 70.2  | 393                                | CP041611         |
| S1A1-7     | 11,713,151           | 12,005,504  | 10,44                     | 70.3  | 513                                | CP041604         |
| pS1A1-7.1  | 292,353 <sup>C</sup> |             | 251                       | 69.7  | -                                  | CP041603         |
| S1A1-8     | 12,036,971           | 12,036,971  | 10,806                    | 70.2  | 394                                | CP041612         |
| S1D4-14    | 11,723,487           | 11,934,498  | 10,472                    | 70.2  | 369                                | CP041607         |
| pS1D4-14.1 | 112,196 <sup>L</sup> |             | 117                       | 68.7  | 0                                  | CP041605         |
| pS1D4-14.2 | 98,815 <sup>C</sup>  |             | 150                       | 69.1  | -                                  | CP041606         |
| S1D4-20    | 11,851,257           | 12,245,276  | 10,642                    | 70.2  | 373                                | CP041609         |
| pS1D4-20.1 | 394,019 <sup>L</sup> |             | 372                       | 69.1  | 68                                 | CP041608         |
| S1D4-23    | 12,057,712           | 12,057,712  | 11                        | 70.2  | 421                                | CP041613         |

<sup>L</sup> indicates an extrachromosomal replicon detected by PFGE.

<sup>C</sup> indicates a circular extrachromosomal replicon identified in *silico* and consistently not visible in PFGE.
