# Supplementary material for: Massive Gene Flux Drives Genome Diversity between Sympatric Streptomyces Conspecifics
Source: PubMed Central journal article supplement (PMC6722414; doi:10.1128/mbio.01533-19), 2019-09-03
Supplement: mBio.01533-19-st003.pdf [file mBio.01533-19-st003.pdf]

Table S3 - continued

| CDS position in RLB1-8<br>(Reference) | Strains |         |        |        |        |        |        |         |        |         |         |
|---------------------------------------|---------|---------|--------|--------|--------|--------|--------|---------|--------|---------|---------|
|                                       | RLB1-8  | S1D4-23 | RLB1-9 | S1A1-3 | S1A1-8 | S1A1-7 | RLB3-6 | RLB3-17 | RLB3-5 | S1D4-14 | S1D4-20 |
| 376                                   | 4       | 4       | 4      | 4      | 4      | 4      | 4      | 5       | 4      | 4       | 4       |
| 378                                   | 2       | 2       | 3      | 3      | 3      | 2      | 2      | 2       | 2      | 2       | 2       |
| 384                                   | 1       | 1       | 3      | 3      | 3      | 1      | 1      | 1       | 1      | 1       | 1       |
| 422                                   | 1       | 57      | 1      | 1      | 1      | 1      | 57     | 1       | 1      | 1       | 1       |
| 448                                   | 0       | 3       | 0      | 0      | 0      | 0      | 0      | 0       | 0      | 0       | 0       |
| 455                                   | 5       | 5       | 5      | 5      | 5      | 5      | 5      | 6       | 5      | 5       | 5       |
| 465                                   | 0       | 0       | 4      | 4      | 4      | 0      | 0      | 0       | 0      | 0       | 0       |
| 467                                   | 3       | 3       | 6      | 6      | 6      | 3      | 3      | 1       | 3      | 3       | 3       |
| 469                                   | 2       | 2       | 2      | 2      | 2      | 3      | 2      | 2       | 2      | 2       | 2       |
| 474                                   | 5       | 1       | 5      | 5      | 5      | 5      | 1      | 5       | 5      | 5       | 5       |
| 476                                   | 0       | 0       | 2      | 2      | 2      | 3/0    | 0      | 3/0     | 0      | 0       | 0       |
| 510                                   | 6       | 6       | 2      | 2      | 2      | 6      | 6      | 2       | 6      | 6       | 6       |
| 513                                   | 3       | 0       | 3      | 3      | 3      | 3      | 0      | 3       | 3      | 3       | 3       |
| 522                                   | 5       | 2       | 5      | 5      | 5      | 5      | 2      | 5       | 5      | 5       | 5       |
| 525                                   | 2       | 2       | 2      | 2      | 2      | 4      | 2      | 2       | 2      | 2       | 2       |
| 530                                   | 0       | 0       | 5      | 5      | 5      | 0      | 0      | 0       | 0      | 0       | 0       |
| 531                                   | 3       | 4       | 3      | 3      | 3      | 3      | 4      | 3       | 3      | 3       | 3       |
| 537                                   | 20      | 10      | 20     | 20     | 20     | 20     | 10     | 20      | 20     | 20      | 20      |
| 543                                   | 14      | 14      | 12     | 12     | 12     | 5      | 14     | 12      | 14     | 14      | 14      |
| 565                                   | 0       | 0       | 0      | 0      | 0      | 16     | 0      | 4       | 0      | 0       | 0       |
| 578                                   | 2       | 2       | 2      | 2      | 2      | 2      | 5      | 2       | 2      | 2       | 2       |
| 582                                   | 0       | 8       | 0      | 0      | 0      | 0      | 4      | 0       | 0      | 0       | 0       |
| 584                                   | 3       | 3       | 3      | 3      | 3      | 3      | 4      | 3       | 3      | 3       | 3       |
| 600                                   | 2       | 2       | 3      | 3      | 3      | 2      | 2      | 3       | 2      | 2       | 2       |
| 610                                   | 14      | 14      | 37     | 37     | 37     | 33     | 14     | 33      | 14     | 14      | 14      |
| 616                                   | 1       | 1       | 1      | 1      | 1      | 1      | 3      | 1       | 1      | 1       | 1       |
| 626                                   | 3       | 3       | 2      | 2      | 2      | 2      | 3      | 3       | 3      | 3       | 3       |

Table S3 - continued

| CDS position in RLB1-8<br>(Reference) | Strains |         |        |        |        |        |        |         |        |         |         |
|---------------------------------------|---------|---------|--------|--------|--------|--------|--------|---------|--------|---------|---------|
|                                       | RLB1-8  | S1D4-23 | RLB1-9 | S1A1-3 | S1A1-8 | S1A1-7 | RLB3-6 | RLB3-17 | RLB3-5 | S1D4-14 | S1D4-20 |
| 630                                   | 3       | 3       | 3      | 3      | 3      | 3      | 3      | 3       | 3      | 3       | 3       |
| 639                                   | 0       | 0       | 3      | 3      | 3      | 0      | 0      | 0       | 0      | 0       | 0       |
| 643                                   | 35      | 2       | 35     | 35     | 35     | 2      | 2      | 35      | 35     | 35      | 35      |
| 674                                   | 5       | 5       | 5      | 5      | 5      | 5      | 5      | 3       | 5      | 5       | 5       |
| 693                                   | 3       | 3       | 3      | 3      | 3      | 3      | 4      | 3       | 3      | 3       | 3       |
| 701                                   | 1       | 1       | 1      | 4      | 4      | 1      | 1      | 1       | 1      | 1       | 1       |
| 705                                   | 4       | 4       | 4      | 2      | 2      | 4      | 4      | 2       | 4      | 4       | 4       |
| 712                                   | 2       | 4       | 2      | 2      | 2      | 2      | 4      | 2       | 2      | 2       | 2       |
| 731                                   | 1       | 17      | 1      | 1      | 1      | 1      | 17     | 1       | 1      | 1       | 1       |
| 755                                   | 2       | 7       | 3      | 3      | 3      | 2      | 3      | 2       | 2      | 2       | 2       |
| 760                                   | 3       | 1       | 1      | 1      | 1      | 3      | 1      | 3       | 3      | 3       | 3       |
| 766                                   | 7       | 7       | 4      | 4      | 4      | 4      | 7      | 4       | 7      | 7       | 7       |
| 769                                   | 4       | 7       | 4      | 4      | 4      | 4      | 7      | 4       | 4      | 4       | 4       |
| 779                                   | 0       | 3       | 0      | 0      | 0      | 0      | 3      | 0       | 0      | 0       | 0       |
| 810                                   | 6       | 1       | 6      | 6      | 6      | 6      | 1      | 6       | 6      | 6       | 6       |
| 852                                   | 1       | 6       | 1      | 1      | 1      | 1      | 6      | 1       | 1      | 1       | 1       |
| 855                                   | 4       | 5       | 4      | 4      | 4      | 4      | 5      | 4       | 4      | 4       | 4       |
| 930                                   | 6       | 4       | 4      | 4      | 4      | 6      | 4      | 6       | 6      | 6       | 6       |
| 938                                   | 12      | 0       | 0      | 0      | 0      | 12     | 0      | 12      | 12     | 12      | 12      |
| 1011                                  | 0       | 59      | 59     | 59     | 59     | 59     | 59     | 0       | 0      | 0       | 0       |
| 1013                                  | 3       | 5       | 3      | 3      | 3      | 5      | 3      | 3       | 3      | 3       | 3       |
| 1037                                  | 1       | 7       | 1      | 1      | 1      | 1      | 7      | 1       | 1      | 1       | 1       |
| 1054                                  | 1       | 8       | 1      | 1      | 1      | 1      | 8      | 1       | 1      | 1       | 1       |
| 1077                                  | 0       | 7       | 0      | 0      | 0      | 0      | 6      | 0       | 0      | 0       | 0       |
| 1104                                  | 1       | 1       | 1      | 4      | 4      | 1      | 1      | 1       | 1      | 1       | 1       |
| 1216                                  | 3       | 0       | 0      | 0      | 0      | 0      | 0      | 0       | 3      | 3       | 3       |
| 1252                                  | 5       | 5       | 1      | 1      | 1      | 1      | 5      | 5       | 5      | 5       | 5       |
| 1411                                  | 3       | 7       | 12     | 13     | 13     | 3      | 3      | 3       | 3      | 3       | 3       |

Table S3 - continued

| CDS position in RLB1-8<br>(Reference) | Strains |         |        |        |        |        |        |         |        |         |         |
|---------------------------------------|---------|---------|--------|--------|--------|--------|--------|---------|--------|---------|---------|
|                                       | RLB1-8  | S1D4-23 | RLB1-9 | S1A1-3 | S1A1-8 | S1A1-7 | RLB3-6 | RLB3-17 | RLB3-5 | S1D4-14 | S1D4-20 |
| 1425                                  | 103     | 95      | 172    | 175    | 175    | 95     | 95     | 18      | 103    | 103     | 103     |
| 1433                                  | 58      | 58      | 58     | 58     | 58     | 20     | 20     | 58      | 58     | 58      | 58      |
| 1523                                  | 20      | 20      | 20     | 20     | 20     | 20     | 20     | 8       | 20     | 20      | 20      |
| 1530                                  | 10      | 2       | 10     | 10     | 10     | 3      | 1      | 10      | 10     | 10      | 10      |
| 1532                                  | 3       | 3       | 0      | 0      | 0      | 3      | 3      | 3       | 3      | 3       | 3       |
| 1562                                  | 2       | 2       | 2      | 2      | 2      | 2      | 5      | 2       | 2      | 2       | 2       |
| 1597                                  | 7       | 7       | 7      | 7      | 7      | 7      | 7      | 0       | 7      | 7       | 7       |
| 1619                                  | 1       | 3       | 1      | 1      | 1      | 3      | 3      | 5       | 1      | 1       | 1       |
| 1630                                  | 4       | 6       | 4      | 4      | 4      | 4      | 4      | 4       | 4      | 4       | 4       |
| 1638                                  | 28      | 6       | 28     | 28     | 28     | 2      | 3      | 87      | 28     | 28      | 28      |
| 1642                                  | 2       | 2       | 5      | 5      | 5      | 2      | 2      | 2       | 2      | 2       | 2       |
| 1658                                  | 3       | 3       | 4      | 4      | 3      | 3      | 3      | 3       | 3      | 3       | 3       |
| 1672                                  | 0       | 0       | 6      | 5      | 5      | 0      | 0      | 0       | 0      | 0       | 0       |
| 1677                                  | 17      | 4       | 17     | 17     | 17     | 5      | 17     | 17      | 17     | 17      | 17      |
| 1687                                  | 1       | 1       | 4      | 4      | 4      | 1      | 1      | 1       | 1      | 1       | 1       |
| 1700                                  | 4       | 20      | 4      | 4      | 4      | 4      | 4      | 4       | 4      | 4       | 4       |
| 1713                                  | 4       | 4       | 4      | 4      | 4      | 11     | 12     | 11      | 4      | 4       | 4       |
| 1727                                  | 105     | 0       | 105    | 105    | 105    | 0      | 0      | 105     | 105    | 105     | 105     |
| 1737                                  | 12      | 12      | 12     | 12     | 12     | 12     | 12     | 12      | 12     | 12      | 12      |
| 1741                                  | 5       | 5       | 4      | 5      | 5      | 5      | 5      | 5       | 5      | 5       | 5       |
| 1745                                  | 5       | 1       | 5      | 5      | 5      | 1      | 2      | 5       | 5      | 5       | 5       |
| 1758                                  | 5       | 0       | 5      | 5      | 5      | 1      | 0      | 5       | 5      | 5       | 5       |
| 1829                                  | 2       | 2       | 2      | 2      | 2      | 2      | 2      | 11      | 2      | 2       | 2       |
| 1845                                  | 4       | 0       | 4      | 4      | 4      | 0      | 4      | 4       | 4      | 4       | 4       |
| 1876                                  | 3       | 3       | 2      | 2      | 2      | 27     | 38     | 5       | 3      | 3       | 3       |
| 1878                                  | 13      | 10      | 13     | 13     | 13     | 13     | 13     | 13      | 13     | 13      | 13      |
| 1903                                  | 0       | 4       | 0      | 0      | 0      | 0      | 4      | 0       | 0      | 0       | 0       |
| 2017                                  | 2       | 12      | 2      | 2      | 2      | 2      | 37     | 2       | 2      | 2       | 2       |

Table S3 - continued

| CDS position in RLB1-8<br>(Reference) | Strains |         |        |        |        |        |        |         |        |         |         |
|---------------------------------------|---------|---------|--------|--------|--------|--------|--------|---------|--------|---------|---------|
|                                       | RLB1-8  | S1D4-23 | RLB1-9 | S1A1-3 | S1A1-8 | S1A1-7 | RLB3-6 | RLB3-17 | RLB3-5 | S1D4-14 | S1D4-20 |
| 2067                                  | 4       | 3       | 11     | 11     | 11     | 11     | 7      | 4       | 4      | 1       | 1       |
| 2080                                  | 3       | 8       | 3      | 3      | 3      | 3      | 8      | 3       | 3      | 3       | 3       |
| 2153                                  | 12      | 14      | 12     | 12     | 12     | 12     | 14     | 12      | 12     | 12      | 12      |
| 2296                                  | 0       | 7       | 0      | 0      | 0      | 0      | 7      | 0       | 0      | 0       | 0       |
| 2359                                  | 2       | 2       | 2      | 2      | 2      | 4      | 2      | 2       | 2      | 2       | 2       |
| 2509                                  | 2       | 2       | 2      | 2      | 2      | 2      | 2      | 3       | 2      | 2       | 2       |
| 2614                                  | 0       | 3       | 0      | 0      | 0      | 0      | 3      | 0       | 0      | 0       | 0       |
| 2940                                  | 0       | 0       | 0      | 0      | 0      | 0      | 0      | 3       | 0      | 0       | 0       |
| 2977                                  | 41*     | 0       | 0      | 0      | 0      | 0      | 0      | 0       | 41*    | 41*     | 41*     |
| 3222                                  | 0       | 4       | 0      | 0      | 0      | 0      | 0      | 0       | 0      | 0       | 0       |
| 3485                                  | 0       | 0       | 20     | 20     | 20     | 20     | 0      | 0       | 0      | 0       | 0       |
| 3778                                  | 1       | 6       | 1      | 1      | 1      | 1      | 6      | 1       | 1      | 1       | 1       |
| 3785                                  | 0       | 4       | 0      | 0      | 0      | 0      | 4      | 0       | 0      | 0       | 0       |
| 3881                                  | 0       | 0       | 0      | 0      | 0      | 0      | 24*    | 0       | 0      | 0       | 0       |
| 3954                                  | 2       | 15*     | 2      | 2      | 2      | 17*    | 2      | 2       | 2      | 2       | 2       |
| 3956                                  | 0       | 0       | 0      | 0      | 0      | 0      | 0      | 0       | 0      | 0       | 84      |
| 4202                                  | 0       | 0       | 7      | 10     | 10     | 0      | 0      | 0       | 0      | 0       | 0       |
| 4252                                  | 3       | 3       | 3      | 3      | 3      | 5      | 3      | 3       | 3      | 3       | 3       |
| 4254                                  | 1       | 21*     | 1      | 1      | 1      | 1      | 21*    | 1       | 1      | 1       | 1       |
| 4351                                  | 0       | 7       | 0      | 0      | 0      | 0      | 7      | 0       | 0      | 0       | 0       |
| 4356                                  | 2       | 18*     | 2      | 2      | 2      | 2      | 4      | 2       | 2      | 2       | 2       |
| 4371                                  | 4       | 2       | 4      | 4      | 4      | 4      | 2      | 4       | 4      | 4       | 4       |
| 4380                                  | 8       | 6       | 8      | 8      | 8      | 8      | 6      | 8       | 8      | 8       | 8       |
| 4382                                  | 6       | 6       | 1      | 1      | 1      | 1      | 6      | 6       | 6      | 6       | 6       |
| 4384                                  | 4       | 4       | 4      | 4      | 4      | 4      | 4      | 0       | 4      | 4       | 4       |
| 4566                                  | 19      | 6       | 4      | 4      | 4      | 13     | 4      | 19      | 19     | 19      | 19      |



Table S3 - continued

| CDS position in RLB1-8<br>(Reference) | Strains |         |        |        |        |        |        |         |        |         |         |
|---------------------------------------|---------|---------|--------|--------|--------|--------|--------|---------|--------|---------|---------|
|                                       | RLB1-8  | S1D4-23 | RLB1-9 | S1A1-3 | S1A1-8 | S1A1-7 | RLB3-6 | RLB3-17 | RLB3-5 | S1D4-14 | S1D4-20 |
| 7232                                  | 3       | 3       | 3      | 3      | 3      | 3      | 3      | 3       | 3      | 3       | 5       |
| 7408                                  | 0       | 0       | 0      | 0      | 0      | 3      | 0      | 0       | 0      | 0       | 0       |
| 7441                                  | 1       | 3       | 1      | 1      | 1      | 1      | 3      | 1       | 1      | 1       | 1       |
| 7473                                  | 0       | 0       | 0      | 0      | 0      | 0      | 0      | 36*     | 0      | 0       | 0       |
| 7483                                  | 0       | 0       | 19*    | 19*    | 19*    | 0      | 15*    | 0       | 0      | 0       | 0       |
| 7663                                  | 3       | 1       | 1      | 1      | 1      | 1      | 1      | 1       | 3      | 3       | 3       |
| 7811                                  | 0       | 0       | 0      | 0      | 0      | 3      | 0      | 0       | 0      | 0       | 0       |
| 7945                                  | 1       | 1       | 1      | 1      | 1      | 1      | 4      | 1       | 1      | 1       | 1       |
| 7949                                  | 2       | 4       | 2      | 2      | 2      | 2      | 4      | 2       | 2      | 2       | 2       |
| 7977                                  | 24      | 11      | 2      | 2      | 2      | 12     | 11     | 5       | 24     | 24      | 24      |
| 8028                                  | 4       | 0       | 0      | 0      | 0      | 0      | 0      | 0       | 4      | 4       | 4       |
| 8059                                  | 0       | 0       | 0      | 0      | 0      | 17     | 0      | 0       | 0      | 0       | 0       |
| 8063                                  | 1       | 1       | 1      | 1      | 1      | 4      | 1      | 1       | 1      | 1       | 1       |
| 8114                                  | 1       | 1       | 1      | 1      | 1      | 5      | 1      | 1       | 1      | 1       | 1       |
| 8117                                  | 0       | 95      | 0      | 0      | 0      | 0      | 95     | 0       | 0      | 0       | 0       |
| 8183                                  | 0       | 241     | 139    | 138    | 138    | 53     | 241    | 144     | 0      | 0       | 0       |
| 8302                                  | 0       | 0       | 0      | 0      | 0      | 17     | 0      | 17      | 0      | 0       | 0       |
| 8390                                  | 0       | 0       | 4      | 4      | 4      | 0      | 0      | 4       | 0      | 0       | 0       |
| 8445                                  | 0       | 0       | 3      | 3      | 3      | 0      | 0      | 3       | 0      | 0       | 0       |
| 8452                                  | 3       | 3       | 5      | 5      | 5      | 3      | 3      | 5       | 3      | 3       | 3       |
| 8595                                  | 52      | 0       | 0      | 0      | 0      | 0      | 0      | 52      | 52     | 52      | 52      |
| 8687                                  | 0       | 0       | 27     | 27     | 27     | 0      | 0      | 31      | 0      | 0       | 0       |
| 8704                                  | 0       | 0       | 0      | 0      | 0      | 25*    | 0      |         | 0      | 0       | 0       |
| 9051                                  | 1       | 1       | 3      | 1      | 1      | 1      | 1      | 1       | 1      | 1       | 1       |
| 9063                                  | 1       | 3       | 1      | 1      | 1      | 1      | 3      | 1       | 1      | 1       | 1       |
| 9082                                  | 0       | 0       | 0      | 0      | 0      | 3      | 0      | 3       | 0      | 0       | 0       |
| 9139                                  | 4       | 4       | 4      | 4      | 4      | 4      | 4      | 5       | 4      | 4       | 4       |

Table S3 - continued

| CDS position in RLB1-8<br>(Reference) | Strains |         |        |        |        |        |        |         |        |         |         |
|---------------------------------------|---------|---------|--------|--------|--------|--------|--------|---------|--------|---------|---------|
|                                       | RLB1-8  | S1D4-23 | RLB1-9 | S1A1-3 | S1A1-8 | S1A1-7 | RLB3-6 | RLB3-17 | RLB3-5 | S1D4-14 | S1D4-20 |
| 9163                                  | 4       | 4       | 4      | 4      | 4      | 4      | 5      | 4       | 4      | 4       | 4       |
| 9362                                  | 2       | 6       | 2      | 2      | 2      |        | 6      | 2       | 2      | 2       | 2       |
| 9374                                  | 7       | 8       | 7      | 7      | 7      | 8      | 12     | 7       | 7      | 7       | 7       |
| 9400                                  | 6       | 0       | 6      | 6      | 6      | 0      | 0      | 6       | 6      | 6       | 6       |
| 9403                                  | 3       | 3       | 0      | 0      | 0      | 3      | 3      | 0       | 3      | 3       | 3       |
| 9409                                  | 1       | 1       | 1      | 1      | 1      | 1      | 3      | 1       | 1      | 1       | 1       |
| 9428                                  | 4       | 4       | 3      | 3      | 3      | 3      | 4      | 4       | 4      | 4       | 4       |
| 9435                                  | 7       | 7       | 7      | 7      | 7      | 7      | 10     | 7       | 7      | 7       | 7       |
| 9444                                  | 0       | 3       | 0      | 0      | 0      | 0      | 0      | 0       | 0      | 0       | 0       |
| 9610                                  | 4       | 1       | 4      | 4      | 4      | 4      | 1      | 4       | 4      | 4       | 4       |
| 9735                                  | 1       |         | 1      | 1      | 1      | 1      | 1      | 1       | 87     | 1       | 1       |
| 9831                                  | 1       | 34      | 1      | 1      | 1      | 1      | 32     | 1       |        | 1       | 1       |
| 9851                                  | 0       | 0       | 3      | 3      | 3      | 0      | 0      | 0       | 0      | 0       | 0       |
| 9962                                  | 2       | 5       | 7      | 7      | 7      | 5      | 5      | 7       | 2      | 2       | 2       |
| 9986                                  | 9       | 6       | 9      | 9      | 9      | 9      | 6      | 9       | 9      | 9       | 9       |
| 10169                                 | 2       | 4       | 2      | 2      | 2      | 7      | 4      | 2       | 2      | 2       | 2       |
| 10189                                 | 4       | 8       | 4      | 4      | 4      | 4      | 4      | 4       | 4      | 4       | 4       |
| 10192                                 | 1       | 1       | 1      | 1      | 1      | 1      | 6      | 1       | 1      | 1       | 1       |
| 10197                                 | 4       | 4       | 5      | 5      | 5      | 4      | 4      | 5       | 4      | 4       | 4       |
| 10211                                 | 3       | 0       | 0      | 0      | 0      | 0      | 0      | 0       | 3      | 3       | 3       |
| 10239                                 | 1       | 1       | 4      | 4      | 4      | 1      | 1      | 4       | 1      | 1       | 1       |
| 10254                                 | 10      | 10      | 2      | 2      | 2      | 10     | 10     | 2       | 10     | 10      | 10      |
| 10261                                 | 3       | 3       | 3      | 3      | 3      | 4      | 3      | 3       | 3      | 3       | 3       |
| 10283                                 | 14      | 2       | 14     | 14     | 14     | 2      | 2      | 14      | 14     | 14      | 14      |
| 10299                                 | 8       | 1       | 8      | 8      | 8      | 1      | 1      | 8       | 8      | 8       | 8       |
| 10325                                 | 1       | 1       | 1      | 1      | 1      | 1      | 1      | 5       | 1      | 1       | 1       |
| 10328                                 | 2       | 9       | 2      | 2      | 2      | 9      | 9      | 2       | 2      | 2       | 2       |
| 10337                                 | 5       | 5       | 5      | 5      | 5      | 10     |        | 5       | 5      | 5       | 5       |



**Table S3 - continued**

| CDS position in RLB1-8<br>(Reference) | Strains |         |        |        |        |        |        |         |        |         |         |
|---------------------------------------|---------|---------|--------|--------|--------|--------|--------|---------|--------|---------|---------|
|                                       | RLB1-8  | S1D4-23 | RLB1-9 | S1A1-3 | S1A1-8 | S1A1-7 | RLB3-6 | RLB3-17 | RLB3-5 | S1D4-14 | S1D4-20 |
| 10347                                 | 0       | 0       | 0      | 0      | 0      | 0      | 0      | 3       | 0      | 0       | 0       |
| 10351                                 | 3       | 3       | 3      | 3      | 3      | 12     | 3      | 3       | 3      | 3       | 3       |
| 10376                                 | 7       | 22      | 7      | 7      | 7      | 7      | 22     | 7       | 7      | 7       | 7       |
| 10400                                 | 2       | 2       | 2      | 2      | 2      | 5      | 2      | 2       | 2      | 2       | 2       |
| 10430                                 | 5       | 5       | 5      | 5      | 5      | 5      | 10     | 5       | 5      | 5       | 5       |
| 10441                                 | 1       | 1       | 1      | 1      | 1      | 1      | 7      | 1       | 1      | 1       | 1       |
| 10448                                 | 29      | 7       | 29     | 29     | 29     | 29     | 11     | 29      | 29     | 29      | 29      |
| 10470                                 | 2       | 2       | 2      | 4      | 2      | 2      | 2      | 2       | 2      | 2       | 2       |
| 10472                                 | 0       | 0       | 0      | 0      | 0      | 0      | 0      | 3       | 0      | 0       | 0       |
| 10487                                 | 4       | 4       | 4      | 4      | 4      | 2      | 7      | 4       | 4      | 4       | 4       |
| 10497                                 | 4       | 4       | 2      | 5      | 5      | 4      | 4      | 2       | 4      | 4       | 4       |
